# Supplementary material for: Multimodal Analgesia After Posterior Fossa Decompression With and Without Duraplasty for Children With Chiari Type I
Source: Oxford University Press journal article supplement (doi:10.1542/hpeds.2019-0298), 2020-05-01
Supplement: hpeds_2019-0298supplementarydata.pdf [file hpeds_2019-0298supplementarydata.pdf]

## Supplemental Information

**SUPPLEMENTAL TABLE 4** Version A (Without *P* Values): Baseline Characteristics by Procedure and Protocol Status (*N* = 78)

| Group                               | Overall          |  | PFD ( <i>n</i> = 49, 63%)        |                               | PFDD ( <i>n</i> = 29, 37%)        |                                |
|-------------------------------------|------------------|--|----------------------------------|-------------------------------|-----------------------------------|--------------------------------|
|                                     | <i>n</i> (row %) |  | PFD Without MMA ( <i>n</i> = 16) | PFD With MMA ( <i>n</i> = 33) | PFDD Without MMA ( <i>n</i> = 15) | PFDD With MMA ( <i>n</i> = 14) |
| Age, <i>y</i> , median (IQR)        | 12 (8–15)        |  | 12 (7.3–16.3)                    | 11 (7–15.5)                   | 13 (9–15)                         | 11 (7.5–17)                    |
| Sex, <i>n</i> (column %)            |                  |  |                                  |                               |                                   |                                |
| Male                                | 32 (41)          |  | 2 (13)                           | 15 (45)                       | 7 (53)                            | 8 (57)                         |
| Female                              | 46 (59)          |  | 14 (88)                          | 18 (55)                       | 8 (47)                            | 6 (43)                         |
| Surgeon, <i>n</i> (column %; row %) |                  |  |                                  |                               |                                   |                                |
| 1                                   | 31 (40)          |  | 5 (31; 22)                       | 18 (55; 78)                   | 1 (7; 13)                         | 7 (50; 87)                     |
| 2                                   | 47 (60)          |  | 11 (69; 42)                      | 15 (45; 58)                   | 14 (93; 66)                       | 7 (50; 33)                     |
| Year of admission, <i>n</i> (row %) |                  |  |                                  |                               |                                   |                                |
| 2012                                | 11 (14)          |  | 2 (25)                           | 6 (75)                        | 3 (100)                           | 0                              |
| 2013                                | 12 (15)          |  | 4 (50)                           | 4 (50)                        | 4 (100)                           | 0                              |
| 2014                                | 7 (9)            |  | 3 (60)                           | 2 (40)                        | 1 (50)                            | 1 (50)                         |
| 2015                                | 17 (22)          |  | 3 (27)                           | 8 (73)                        | 5 (83)                            | 1 (17)                         |
| 2016                                | 14 (18)          |  | 3 (33)                           | 6 (67)                        | 1 (20)                            | 4 (80)                         |
| 2017                                | 17 (22)          |  | 1 (13)                           | 7 (88)                        | 1 (11)                            | 8 (89)                         |
| Race, <i>n</i> (column %)           |                  |  |                                  |                               |                                   |                                |
| White                               | 53 (68)          |  | 14 (88)                          | 20 (61)                       | 10 (67)                           | 9 (64)                         |
| Unknown                             | 19 (24)          |  | 1 (6)                            | 9 (27)                        | 4 (27)                            | 5 (36)                         |
| Other                               | 3 (4)            |  | 0                                | 3 (9)                         | 0                                 | 0                              |
| Asian American                      | 2 (3)            |  | 1 (6)                            | 1 (3)                         | 0                                 | 0                              |
| African American                    | 1 (1)            |  | 0                                | 0                             | 1 (7)                             | 0                              |
| Primary payer, <i>n</i> (row %)     |                  |  |                                  |                               |                                   |                                |
| Blue Cross                          | 27 (35)          |  | 6 (43)                           | 8 (16)                        | 7 (47)                            | 6 (43)                         |
| HMO                                 | 28 (36)          |  | 6 (29)                           | 15 (71)                       | 4 (27)                            | 2 (14)                         |
| Commercial                          | 9 (12)           |  | 2 (40)                           | 3 (60)                        | 2 (13)                            | 3 (21)                         |
| Medicaid                            | 13 (17)          |  | 2 (22)                           | 7 (78)                        | 2 (13)                            | 2 (14)                         |
| Self-pay                            | 1 (1)            |  | 0                                | 0                             | 0                                 | 1 (7)                          |

*P* values were calculated by using Student's *t*,  $\chi^2$ , and Wilcoxon rank tests depending on distribution of data. HMO, Health Maintenance Organization.

**SUPPLEMENTAL TABLE 5** Version B (With *P* Values): Baseline Characteristics by Procedure and Protocol Status (*N* = 78)

| Group                               | Overall                             |                                  |                                      |                                   |          |  |
|-------------------------------------|-------------------------------------|----------------------------------|--------------------------------------|-----------------------------------|----------|--|
|                                     | PFD ( <i>n</i> = 49, 63%)           |                                  | PFDD ( <i>n</i> = 29, 37%)           |                                   | <i>P</i> |  |
|                                     | PFD Without MMA<br>( <i>n</i> = 16) | PFD With MMA<br>( <i>n</i> = 33) | PFDD Without MMA<br>( <i>n</i> = 15) | PFDD With MMA<br>( <i>n</i> = 14) |          |  |
| <i>n</i> (row %)                    | 78                                  |                                  |                                      |                                   |          |  |
| Age, <i>y</i> , median (IQR)        | 12 (8–15)                           | 33 (67)                          | 15 (52)                              | 14 (48)                           | –        |  |
| Sex, <i>n</i> (column %)            |                                     | 11 (7.3–16.3)                    | 13 (9–15)                            | 11 (7.5–17)                       | .322     |  |
| Male                                | 32 (41)                             | 15 (45)                          | 7 (53)                               | 8 (57)                            | .715     |  |
| Female                              | 46 (59)                             | 18 (55)                          | 8 (47)                               | 6 (43)                            | –        |  |
| Surgeon, <i>n</i> (column %; row %) |                                     |                                  |                                      |                                   |          |  |
| 1                                   | 31 (40)                             | 18 (55; 78)                      | 1 (7; 13)                            | 7 (50; 87)                        | .014*    |  |
| 2                                   | 47 (60)                             | 15 (45; 58)                      | 14 (93; 66)                          | 7 (50; 33)                        | –        |  |
| Year of admission, <i>n</i> (row %) |                                     |                                  |                                      |                                   | .005*    |  |
| 2012                                | 11 (14)                             | 6 (75)                           | 3 (100)                              | 0                                 | –        |  |
| 2013                                | 12 (15)                             | 4 (50)                           | 4 (100)                              | 0                                 | –        |  |
| 2014                                | 7 (9)                               | 2 (40)                           | 1 (50)                               | 1 (50)                            | –        |  |
| 2015                                | 17 (22)                             | 8 (73)                           | 5 (83)                               | 1 (17)                            | –        |  |
| 2016                                | 14 (18)                             | 3 (33)                           | 1 (20)                               | 4 (80)                            | –        |  |
| 2017                                | 17 (22)                             | 1 (13)                           | 7 (88)                               | 8 (89)                            | –        |  |
| Race, <i>n</i> (column %)           |                                     |                                  |                                      |                                   | .469     |  |
| White                               | 53 (68)                             | 20 (61)                          | 10 (67)                              | 9 (64)                            | –        |  |
| Unknown                             | 19 (24)                             | 9 (27)                           | 4 (27)                               | 5 (36)                            | –        |  |
| Other                               | 3 (4)                               | 3 (9)                            | 0                                    | 0                                 | –        |  |
| Asian American                      | 2 (3)                               | 1 (3)                            | 0                                    | 0                                 | –        |  |
| African American                    | 1 (1)                               | 0                                | 1 (7)                                | 0                                 | –        |  |
| Primary payer, <i>n</i> (row %)     |                                     |                                  |                                      |                                   | .708     |  |
| Blue Cross                          | 27 (35)                             | 8 (16)                           | 7 (47)                               | 6 (43)                            | –        |  |
| HMO                                 | 28 (36)                             | 15 (71)                          | 4 (27)                               | 2 (14)                            | –        |  |
| Commercial                          | 9 (12)                              | 3 (60)                           | 2 (13)                               | 3 (21)                            | –        |  |
| Medicaid                            | 13 (17)                             | 7 (78)                           | 2 (13)                               | 2 (14)                            | –        |  |
| Self-pay                            | 1 (1)                               | 0                                | 0                                    | 1 (7)                             | –        |  |

HMO, Health Maintenance Organization; –, not applicable.

\* *P* < .05.

**SUPPLEMENTAL TABLE 6** Health Care Use (N = 78)

| Group                                    | Overall                     |                          |                              |                           |                        |  | P    |
|------------------------------------------|-----------------------------|--------------------------|------------------------------|---------------------------|------------------------|--|------|
|                                          | PFD (n = 49, 63%)           |                          | PFDD (n = 29, 37%)           |                           |                        |  |      |
|                                          | PFD Without MMA<br>(n = 16) | PFD With MMA<br>(n = 33) | PFDD Without MMA<br>(n = 15) | PFDD With MMA<br>(n = 14) |                        |  | P    |
| LOS, median (IQR)                        | 2 (2-3)                     | 2 (2-3)                  | 3 (2-3)                      | 3 (2-3)                   |                        |  | .826 |
| Postoperative nausea and vomiting, n (%) | 10 (53%)                    | 15 (45%)                 | 7 (47%)                      | 11 (79%)                  |                        |  | .073 |
| TDC <sup>a</sup> median (IQR)            | 19 673 (17 892-22 264)      | 19 705 (17 374-21 959)   | 18 399 (16 950-19 811)       | 21 846 (20 840-24 627)    | 21 703 (18 900-28 960) |  | .965 |

P values were calculated by using Student's *t*,  $\chi^2$ , and Wilcoxon rank tests depending on distribution of data.

<sup>a</sup> TDCs were calculated for an a priori subgroup of patients with an LOS of 2 (n = 44).
